# Supplementary material
Source: PubMed Central journal article supplement (PMC2867678)
Supplement: 0912409107_pnas.200912409SI.pdf [file 0912409107_pnas.200912409SI.pdf]

# Supporting Information

Kulmuni et al. 10.1073/pnas.0912409107

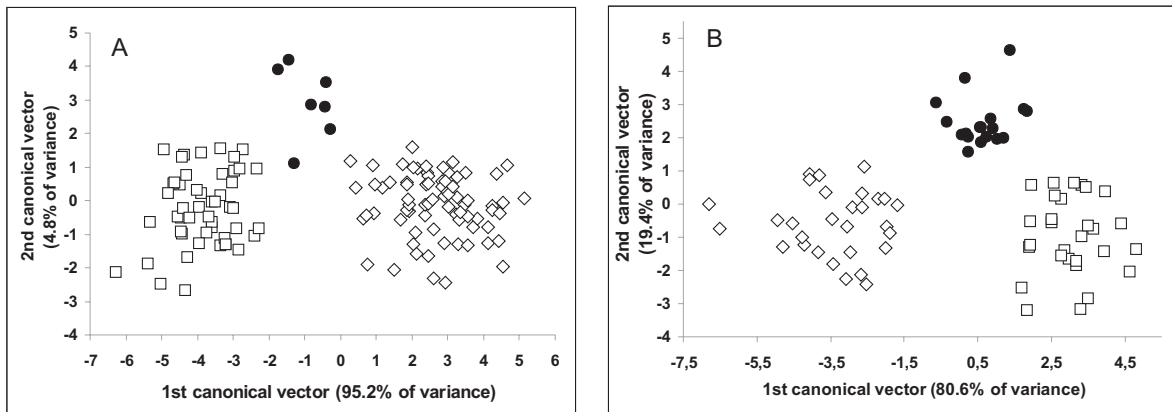

**Fig. S1.** Population has a hybrid background. Morphometric analysis of (A) worker nest samples ( $n = 131$ ) and (B) gynes ( $n = 76$ ) indicates that the study population (black dots) is intermediate between *F. aquilonia* (white rhombs) and *F. polycтена* (white squares). Discriminant vectors were calculated based on 16 and 25 quantitative morphological characters measured in workers and gynes respectively. The pessimistic leave-one-out cross-validation rejects only 3.8% and 1.3% of the classifications of workers and gynes, respectively, in the whole data set, with no rejections occurring in the study population.

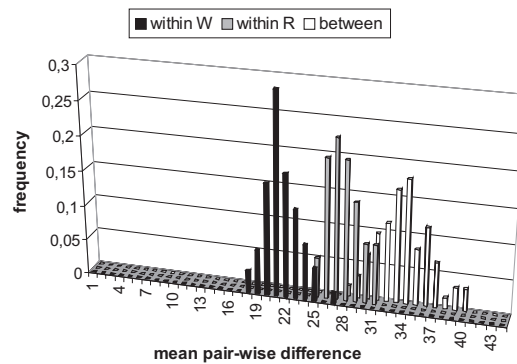

**Fig. S2.** Distribution of mean pair-wise AFLP differences within and between the two genetic groups in males ( $n = 97$ ). The values are calculated as means of each male to all other males in the same group or in the other group. The distributions of pair-wise differences within group W and between the groups do not overlap.

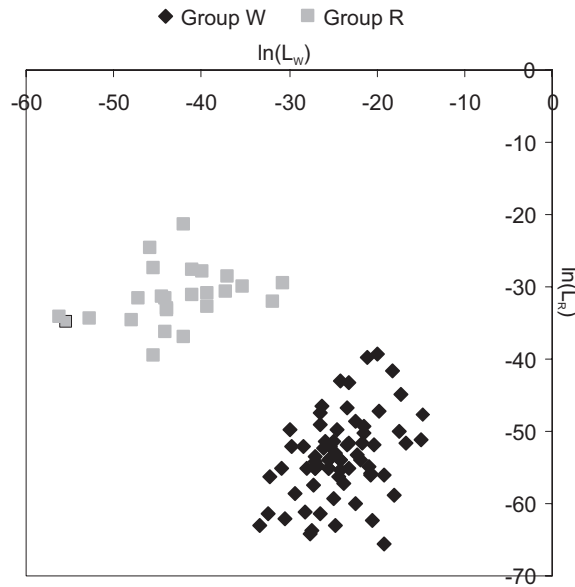

Fig. S3. Assignment of the females (gynes;  $n = 95$ ) to the two male groups R and W. The assignment is based on 17 microsatellite loci.

**Table S1. Allele categories in microsatellite, AFLP, and allozyme markers showing the number of alleles in each category and mean number per individual**

| Allele category                | Total no. |         | Mean no. per individual |           |           |         |
|--------------------------------|-----------|---------|-------------------------|-----------|-----------|---------|
|                                | Loci      | Alleles | W males                 | W females | R females | R males |
| Microsatellites                |           |         |                         |           |           |         |
| Shared by all                  | 16        | 24      | 11.5                    | 23.0      | 22.8      | 11.3    |
| Diagnostic                     |           |         |                         |           |           |         |
| R-specific                     |           |         |                         |           |           |         |
| With only heterozygous females | 9         | 11      | —                       | —         | 4.1       | 4.7     |
| W-specific                     |           |         |                         |           |           |         |
| With only heterozygous females | 1         | 1       | 0.3                     | 0.3       | —         | —       |
| With also homozygous females   | 7         | 7       | 3.0                     | 3.9       | —         | —       |
| Admixed                        |           |         |                         |           |           |         |
| Admixed from R to W            | 3         | 3       | —                       | 0.9       | 2.6       | 0.9     |
| Admixed from W to R            | 5         | 5       | 2.0                     | 5.0       | 3.0       | —       |
| Female-specific                | 3         | 3       | 0.0                     | 0.8       | 1.2       | —       |
| Allozyme (Gpi)                 |           |         |                         |           |           |         |
| Admixed from W to R            | 1         | 1       | 0.8                     | 0.5       | 0.2       | —       |
| AFLP                           |           |         |                         |           |           |         |
| Diagnostic                     |           |         |                         |           |           |         |
| R-specific, recessive          |           | 9       | —                       | ?         | +         | 3.3     |
| R-specific, dominant           |           | 4       | —                       | —         | +         | 1.8     |
| W-specific, recessive          |           | 9       | 3.1                     | +         | ?         | —       |
| W-specific, dominant           |           | 3       | 1.3                     | +         | —         | —       |
| Admixed                        |           |         |                         |           |           |         |
| Admixed from R to W, dominant  |           | 4       | —                       | +         | +         | 1.2     |
| Admixed from W to R, dominant  |           | 1       | 0.8                     | +         | +         | —       |
| Female-specific                |           | 3       | —                       | 0.3       | 1.0       | —       |

A dash indicates that no allele was observed; 0.0 indicates that alleles were observed but the number per individual was less than 0.05; + indicates that alleles were observed but the frequencies could not be inferred because of dominance; ? indicates that the occurrence of the alleles could not be inferred because of dominance.

**Table S2. Microsatellite allele frequencies by genetic group and sex**

| Locus | W males | W females         | W <sub>maternal</sub> | R <sub>maternal</sub> | R females         | R males |
|-------|---------|-------------------|-----------------------|-----------------------|-------------------|---------|
| fe13  |         |                   |                       |                       |                   |         |
| 186   | 0.52    | 0.35              | 0.18                  | 0.04                  | 0.28              | 0.51    |
| 189   | 0.00    | 0.00              | 0.00                  | 0.00*                 | 0.22*             | 0.49*   |
| 198   | 0.48    | 0.65              | 0.82                  | 0.96 <sup>†</sup>     | 0.50 <sup>†</sup> | 0.00    |
| fe17  |         |                   |                       |                       |                   |         |
| 110   | 0.18    | 0.42              | 0.67                  | 0.56 <sup>†</sup>     | 0.28 <sup>†</sup> | 0.00    |
| 116   | 0.82    | 0.58              | 0.33                  | 0.35                  | 0.62              | 0.89    |
| 118   | 0.00    | 0.00              | 0.00                  | 0.09*                 | 0.10*             | 0.11*   |
| fe19  |         |                   |                       |                       |                   |         |
| 178   | 0.34*   | 0.24*             | 0.12*                 | 0.00                  | 0.00              | 0.00    |
| 184   | 0.32    | 0.48              | 0.58                  | 0.77                  | 0.50              | 0.20    |
| 186   | 0.32    | 0.11              | 0.00                  | 0.00                  | 0.38              | 0.80    |
| 191   | 0.02    | 0.17 <sup>‡</sup> | 0.30 <sup>‡</sup>     | 0.23 <sup>‡</sup>     | 0.12 <sup>‡</sup> | 0.00    |
| fe37  |         |                   |                       |                       |                   |         |
| 113   | 0.23    | 0.16              | 0.09                  | 0.05                  | 0.08              | 0.11    |
| 117   | 0.77    | 0.84              | 0.91                  | 0.95                  | 0.92              | 0.89    |
| fe38  |         |                   |                       |                       |                   |         |
| 71    | 0.55    | 0.38              | 0.20                  | 0.32                  | 0.46              | 0.60    |
| 73    | 0.10    | 0.48              | 0.80                  | 0.35                  | 0.32              | 0.29    |
| 75    | 0.35    | 0.14              | 0.00                  | 0.33                  | 0.22              | 0.11    |
| fe42  |         |                   |                       |                       |                   |         |
| 259   | 0.61    | 0.61              | 0.60                  | 0.30                  | 0.42              | 0.54    |
| 261   | 0.39    | 0.39              | 0.40                  | 0.70                  | 0.58              | 0.46    |
| fe51  |         |                   |                       |                       |                   |         |
| 90    | 1.00    | 1.00              | 1.00                  | 1.00                  | 0.79              | 0.51    |
| 92    | 0.00    | 0.00              | 0.00                  | 0.00*                 | 0.21*             | 0.49*   |
| fe7   |         |                   |                       |                       |                   |         |
| 56    | 0.00    | 0.13 <sup>‡</sup> | 0.26 <sup>‡</sup>     | 0.51 <sup>‡</sup>     | 0.27 <sup>‡</sup> | 0.00    |
| 66    | 0.20*   | 0.20*             | 0.20*                 | 0.00                  | 0.00              | 0.00    |
| 68    | 0.80    | 0.67              | 0.55                  | 0.43 <sup>†</sup>     | 0.23 <sup>†</sup> | 0.00    |
| 70    | 0.00    | 0.00              | 0.00                  | 0.00*                 | 0.08*             | 0.23*   |
| 72    | 0.00    | 0.00              | 0.00                  | 0.00*                 | 0.25*             | 0.50*   |
| 89    | 0.00    | 0.00              | 0.00                  | 0.06*                 | 0.17*             | 0.26*   |
| fl12  |         |                   |                       |                       |                   |         |
| 106   | 0.63    | 0.86              | 1.00                  | 0.92                  | 0.66              | 0.40    |
| 110   | 0.00    | 0.00              | 0.00                  | 0.05*                 | 0.28*             | 0.51*   |
| 116   | 0.37    | 0.14              | 0.00                  | 0.03                  | 0.06              | 0.09    |
| fl20  |         |                   |                       |                       |                   |         |
| 111   | 0.00    | 0.00              | 0.00                  | 0.00*                 | 0.28*             | 0.60*   |
| 114   | 0.72    | 0.64              | 0.57                  | 0.40                  | 0.32              | 0.23    |
| 127   | 0.00    | 0.01              | 0.01                  | 0.00                  | 0.00              | 0.00    |
| 128   | 0.28    | 0.35              | 0.42                  | 0.60                  | 0.40              | 0.17    |
| fl21  |         |                   |                       |                       |                   |         |
| 214   | 0.23    | 0.20              | 0.17                  | 0.37                  | 0.59              | 0.80    |
| 219   | 0.00    | 0.17 <sup>†</sup> | 0.34 <sup>†</sup>     | 0.63                  | 0.41              | 0.20    |
| 221   | 0.77*   | 0.63*             | 0.48*                 | 0.00                  | 0.00              | 0.00    |
| fl29  |         |                   |                       |                       |                   |         |
| 182   | 0.70    | 0.58              | 0.46                  | 0.74                  | 0.66              | 0.39    |
| 188   | 0.30    | 0.42              | 0.54                  | 0.26 <sup>†</sup>     | 0.16 <sup>†</sup> | 0.00    |
| 190   | 0.00    | 0.00              | 0.00                  | 0.00*                 | 0.18*             | 0.61*   |
| fy10  |         |                   |                       |                       |                   |         |
| 153   | 0.24*   | 0.14*             | 0.04*                 | 0.00                  | 0.00              | 0.00    |
| 157   | 0.76    | 0.86              | 0.96                  | 1.00                  | 1.00              | 1.00    |
| fy12  |         |                   |                       |                       |                   |         |
| 185   | 0.22    | 0.31              | 0.37                  | 0.53                  | 0.68              | 0.83    |
| 187   | 0.26    | 0.46              | 0.63                  | 0.47                  | 0.32              | 0.17    |
| 189   | 0.52*   | 0.24*             | 0.00*                 | 0.00                  | 0.00              | 0.00    |
| fy13  |         |                   |                       |                       |                   |         |
| 195   | 0.00    | 0.00              | 0.00                  | 0.00*                 | 0.22*             | 0.60*   |
| 197   | 0.03    | 0.11 <sup>‡</sup> | 0.18 <sup>‡</sup>     | 0.38 <sup>‡</sup>     | 0.22 <sup>‡</sup> | 0.00    |
| 199   | 0.44    | 0.64              | 0.82                  | 0.62                  | 0.56              | 0.40    |
| 205   | 0.52*   | 0.25*             | 0.00*                 | 0.00                  | 0.00              | 0.00    |

**Table S2. Cont.**

| Locus | W males | W females         | W <sub>maternal</sub> | R <sub>maternal</sub> | R females         | R males |
|-------|---------|-------------------|-----------------------|-----------------------|-------------------|---------|
| fy15  |         |                   |                       |                       |                   |         |
| 221   | 0.40    | 0.42              | 0.42                  | 0.00                  | 0.08              | 0.18    |
| 222   | 0.00    | 0.07 <sup>†</sup> | 0.14 <sup>†</sup>     | 0.43                  | 0.50              | 0.50    |
| 232   | 0.29    | 0.38              | 0.44                  | 0.57 <sup>†</sup>     | 0.33 <sup>†</sup> | 0.00    |
| 234   | 0.31*   | 0.13*             | 0.00*                 | 0.00                  | 0.00              | 0.00    |
| 240   | 0.00    | 0.00              | 0.00                  | 0.00*                 | 0.08*             | 0.32*   |
| fy3   |         |                   |                       |                       |                   |         |
| 185   | 0.54    | 0.57              | 0.60                  | 0.36                  | 0.58              | 0.08    |
| 188   | 0.46*   | 0.25*             | 0.03*                 | 0.00                  | 0.00              | 0.00    |
| 190   | 0.00    | 0.18 <sup>†</sup> | 0.36 <sup>†</sup>     | 0.64                  | 0.42              | 0.20    |

The columns W<sub>maternal</sub> and R<sub>maternal</sub> give the allele frequency estimates in the maternal component of the female genomes. The maternal frequencies (X<sub>maternal</sub>) are estimated as X<sub>maternal</sub> = 2X<sub>female</sub> - X<sub>male</sub> and the frequencies for a locus are adjusted by setting estimates less than zero as 0.

\*Diagnostic alleles.

<sup>†</sup>Admixed alleles shown in the group in which these alleles were admixed to.

<sup>‡</sup>Alleles specific (or almost specific) to females.

**Table S3. Population frequencies of female-specific alleles**

| Marker              | W males | W females | R females | R males |
|---------------------|---------|-----------|-----------|---------|
| Microsatellites     |         |           |           |         |
| fe7 <sup>56</sup>   | —       | 0.13      | 0.27      | —       |
| fe19 <sup>191</sup> | 0.02    | 0.17      | 0.12      | —       |
| fy13 <sup>197</sup> | 0.03    | 0.11      | 0.22      | —       |
| AFLP                |         |           |           |         |
| 1                   | —       | 0.11      | 0.38      | —       |
| 2                   | —       | 0.12      | 0.24      | —       |
| 3                   | —       | 0.08      | 0.18      | —       |

**Table S4. Genetic distances (D<sub>A</sub>) by genetic group and sex**

| D <sub>A</sub>        | W <sub>paternal</sub> | W <sub>maternal</sub> | R <sub>maternal</sub> | R <sub>paternal</sub> |
|-----------------------|-----------------------|-----------------------|-----------------------|-----------------------|
| W <sub>paternal</sub> | —                     | 0.16                  | 0.25                  | 0.39                  |
| W <sub>maternal</sub> | 0.02                  | —                     | 0.08                  | 0.38                  |
| R <sub>maternal</sub> | 0.02                  | 0.01                  | —                     | 0.34                  |
| R <sub>paternal</sub> | 0.02                  | 0.01                  | 0.01                  | —                     |

Genetic distances (Nei D<sub>A</sub>, above diagonal) and their SEs (below diagonal) among four haploid genomes (maternal R, maternal W, paternal R, paternal W) calculated on the basis of the allele frequencies in the suggested maternally and paternally inherited haploid genomes.

**Table S5. Mortality estimates calculated on the basis of missing genotypes**

| Group | Sex    | Missing                      | Expected frequency* |
|-------|--------|------------------------------|---------------------|
| R     | Male   | Alleles present in R females | 0.89                |
| W     | Male   | Alleles present in W females | 0.37                |
| R     | Female | Homozygotes                  | 0.65                |
| W     | Female | Homozygotes                  | 0.16                |

As these genotypes were not observed, their expected frequencies estimate the fraction of individuals that have died. The markers do not cover all of the linkage groups, so the estimates are underestimates.

\*The expected frequencies for the missing genotypes are calculated on the basis of allele frequencies and represent a minimum estimate of mortality. Fraction of males that should have at least one of the alleles if they segregate at random is calculated from the allele frequencies in females as  $P = 1 - \Pi(1 - x_{\text{female}})$ . Fraction of females that should be homozygous for at least one of the alleles if they segregate at random is calculated from the expected homozygosities per locus as  $P = 1 - \Pi(1 - \text{HOM}_{\text{exp}})$ .

**Table S6. Sample size and the number of loci studied for each marker type**

| Sample                 | No. of Nests | No. of individuals | No. of AFLP loci | No. of microsatellite loci | No. of enzyme loci | No. of Mt gene* |
|------------------------|--------------|--------------------|------------------|----------------------------|--------------------|-----------------|
| <b>Gynes</b>           |              |                    |                  |                            |                    |                 |
| R                      | 2            | 25                 | 81               | 17                         | 1                  | 1               |
| W                      | 4            | 70                 | 81               | 17                         | 1                  | 1               |
| Total                  | 4            | 95                 |                  |                            |                    |                 |
| <b>Males</b>           |              |                    |                  |                            |                    |                 |
| R                      | 2            | 35                 | 81               | 17                         | 1                  | 1               |
| W                      | 4            | 62                 | 81               | 17                         | 1                  | 1               |
| Total                  | 4            | 97                 |                  |                            |                    |                 |
| <b>Old Queens 2007</b> |              |                    |                  |                            |                    |                 |
| R                      | 1            | 12                 | —                | 14                         | —                  | —               |
| W                      | 1            | 11                 | —                | 14                         | —                  | —               |
| Total                  | 2            | 23                 |                  |                            |                    |                 |
| <b>Old Queens 2008</b> |              |                    |                  |                            |                    |                 |
| R                      | 1            | 10                 | —                | 9                          | —                  | —               |
| W                      | 6            | 40                 | —                | 9                          | —                  | —               |
| Total                  | 7            | 50                 |                  |                            |                    |                 |
| <b>Workers</b>         |              |                    |                  |                            |                    |                 |
| R                      | 3            | 19                 | —                | 14                         | 1                  | 1               |
| W                      | 24           | 115                | —                | 14                         | 1                  | 1               |
| Total                  | 24           | 134                |                  |                            |                    |                 |

Dash indicates that the samples have not been studied with this marker.

\*Only a subset of samples was used for Cytochrome *b* sequencing. These were two W gynes, five W males, one R gyne, four R males, five W workers, and three R workers.
